# Supplementary material for: NMR, surface tension and conductivity studies to determine the inclusion mechanism: thermodynamics of host–guest inclusion complexes of natural amino acids in aqueous cyclodextrins
Source: Royal Society of Chemistry journal article supplement (doi:10.1039/c5nj02179k), 2015-11-16
Supplement: c5nj02179k1.pdf [file c5nj02179k1.pdf]

## New Journal of Chemistry

### Electronic Supplementary Information

#### **NMR, Surface Tension and Conductivity Studies to Determine Inclusion Mechanism: Thermodynamics of Host-Guest Inclusion Complexes of Natural Amino Acids in Aqueous Cyclodextrins**

Subhadeep Saha, Tanusree Ray, Saptarshi Basak and Mahendra Nath Roy

---

#### **Theory**

The physical properties of binary aqueous mixtures in different mass fractions ( $w_n=0.001, 0.003, 0.005$ , where  $n = 1, 2$  for  $\alpha$  and  $\beta$ -CD respectively) of  $\alpha$  and  $\beta$ -CD at 298.15K has been reported in Table S1. The experimental measured values of pH, density, viscosity and refractive index of selected two  $\alpha$ -amino acids (*i.e.*, L-Arg and L-His) in different mass fractions of aqueous  $\alpha$  and  $\beta$ -CD mixture have been listed in Table S3 as a function of concentration (molality).

#### **Apparent molar volume**

The apparent molar volumes  $\phi_V$  were determined from the solutions densities using the equation and given in Table S5.

$$\phi_V = M / \rho - 1000(\rho - \rho_0) / m\rho\rho_0 \quad (1)$$

where  $M$  is the molar mass of the amino acids,  $m$  is the molality of the solution,  $\rho$  and  $\rho_0$  are the density of the solution and aq.  $\alpha$  and  $\beta$ -CD mixture respectively.

The limiting apparent molar volumes  $\phi_V^0$  were obtained by a least-square treatment to the plots of  $\phi_V$  versus  $\sqrt{m}$  using the Masson equation<sup>[1]</sup> and shown in Table S6.

$$\phi_V = \phi_V^0 + S_V^* \cdot \sqrt{m} \quad (2)$$

The standard deviations ( $\sigma$ ) were determined using the following equation:

$$\sigma = \sqrt{[\sum (Y_{\text{exp}} - Y_{\text{obs}})^2 / (N - 1)]} \quad (3)$$

where  $N$  is the number of data points.

- Contributions of zwitter ionic group ( $\text{NH}_3^+$ ), ( $\text{COO}^-$ ); (CH), ( $\text{CH}_2$ ) groups and end group to the limiting apparent molar volume ( $\phi^0_V$ ):

The  $\phi^0_V$  value of zwitterionic group, (CH), ( $\text{CH}_2$ ) groups and end group of the amino acids were estimated from the following equations<sup>[2]</sup>.

$$\phi^0_V = \phi^0_V(\text{NH}_3^+, \text{COO}^-) + \phi^0_V(\text{CH}) + n \phi^0_V(\text{CH}_2) + \phi^0_V(\text{end grp}) \quad (4)$$

$$\phi^0_V(\text{R}) = \phi^0_V - \phi^0_V(\text{NH}_3^+, \text{COO}^-) - \phi^0_V(\text{CH}) \quad (5)$$

$$\phi^0_V(\text{CH}) = \frac{1}{2} \phi^0_V(\text{CH}_2) \quad (6)$$

## Viscosity

The experimental viscosity data for the studied systems are listed in Table S3. The relative viscosity ( $\eta_r$ ) has been analyzed using the Jones-Dole equation<sup>[3]</sup>

$$(\eta/\eta_0 - 1)/\sqrt{m} = (\eta_r - 1)/\sqrt{m} = A + B\sqrt{m} \quad (7)$$

where  $\eta_r = \eta/\eta_0$ ,  $\eta$  and  $\eta_0$  are the relative viscosities, the viscosities of the ternary solutions (amino acid + aq. CD) and binary aqueous mixture (aq. CD) and  $m$  is the molality of the amino acids in ternary solutions.  $A$  and  $B$  are empirical constants known as viscosity  $A$  and  $B$ -coefficients, which are specific to solute-solute and solute-solvent interactions respectively, are estimated by least-square method by plotting  $(\eta_r - 1)/\sqrt{m}$  against  $\sqrt{m}$  and reported in Table S5.

- The  $B$ -coefficients of zwitterionic group, (CH), (CH<sub>2</sub>) groups and end group of the amino acids have been resolved as follows:

$$B = B(\text{NH}_3^+, \text{COO}^-) + B(\text{CH}) + n B(\text{CH}_2) + B(\text{end grp}) \quad (8)$$

$$B(\text{R}) = B - B(\text{NH}_3^+, \text{COO}^-) - B(\text{CH}) \quad (9)$$

$$B(\text{CH}) = \frac{1}{2} B(\text{CH}_2) \quad (10)$$

### Refractive index

The molar refraction,  $R_M$  can be evaluated from the Lorentz-Lorenz relation <sup>[4]</sup>

$$R_M = \left\{ \frac{(n_D^2 - 1)}{(n_D^2 + 2)} \right\} (M/\rho) \quad (11)$$

where  $R_M$ ,  $n_D$ ,  $M$  and  $\rho$  are the molar refraction, the refractive index, the molar mass and the density of solution respectively. The Limiting molar refraction ( $R_M^0$ ) have been estimated from the following relation and reported in Table S6, <sup>[5]</sup>

$$R_M = R_M^0 + R_S \sqrt{m} \quad (12)$$

### References:

- (1) D.O. Masson, *Phil Mag.*, 1929, **8**, 218-223.
- (2) H. Zhao, *Biophys Chem.*, 2006, **122**, 157-183.
- (3) G. Jones and D. Dole, *J. Am. Chem. Soc.*, 1929, **51**, 2950-2964.
- (4) V.Minkin, O. Osipov and Y. Zhdanov, *Dipole Moments in Organic Chemistry*. New York, Plenum Press, 1970.
- (5) M.N. Roy, D. Ekka, S. Saha and M. C. Roy, *RSC Adv.*, 2014, **4**, 42383-42390.

**Tables:**

**Table S1. Experimental values of density ( $\rho$ ), viscosity ( $\eta$ ), refractive index ( $n_D$ ) and pH of different mass fractions of aqueous  $\alpha$  and  $\beta$ -cyclodextrin mixtures at 298.15 K<sup>a</sup>**

| Aq. solvent mixture | $\rho \times 10^{-3}$<br>/kg·m <sup>-3</sup> | $\eta$<br>/mP·s | $n_D$  | pH   |
|---------------------|----------------------------------------------|-----------------|--------|------|
| aq. $\alpha$ -CD    |                                              |                 |        |      |
| $w_1 = 0.001$       | 0.99737                                      | 1.29            | 1.3329 | 6.65 |
| $w_1 = 0.003$       | 0.99800                                      | 1.30            | 1.3332 | 6.60 |
| $w_1 = 0.005$       | 0.99865                                      | 1.31            | 1.3335 | 6.56 |
| aq. $\beta$ -CD     |                                              |                 |        |      |
| $w_2 = 0.001$       | 0.99752                                      | 1.30            | 1.3330 | 6.58 |
| $w_2 = 0.003$       | 0.99817                                      | 1.31            | 1.3333 | 6.53 |
| $w_2 = 0.005$       | 0.99893                                      | 1.32            | 1.3336 | 6.50 |

<sup>a</sup> Standard uncertainties  $u$  are:  $u(\rho) = 5 \times 10^{-5} \text{ g}\cdot\text{cm}^{-3}$ ,  $u(\eta) = 0.003 \text{ mP}\cdot\text{s}$ ,  $u(n_D) = 0.0002$ ,  $u(\text{pH}) = 0.01$ , and  $u(T) = 0.01 \text{ K}$ .

**Table S2. Experimental values of density ( $\rho$ ) and viscosity ( $\eta$ ) of glycine in different mass fractions of aqueous  $\alpha$  and  $\beta$ -cyclodextrin mixtures at 298.15 K<sup>a</sup>**

| molality<br>/mol·kg <sup>-1</sup> | $\rho \times 10^{-3}$<br>/kg·m <sup>-3</sup> | $\eta$<br>/mP·s | molality<br>/mol·kg <sup>-1</sup> | $\rho \times 10^{-3}$<br>/kg·m <sup>-3</sup> | $\eta$<br>/mP·s |
|-----------------------------------|----------------------------------------------|-----------------|-----------------------------------|----------------------------------------------|-----------------|
| Glycine                           |                                              |                 |                                   |                                              |                 |
| $w_1 = 0.001^b$                   |                                              |                 | $w_2 = 0.001^b$                   |                                              |                 |
| 0.0100                            | 0.99767                                      | 1.31            | 0.0100                            | 0.99779                                      | 1.31            |
| 0.0251                            | 0.99820                                      | 1.31            | 0.0251                            | 0.99835                                      | 1.32            |
| 0.0402                            | 0.99874                                      | 1.32            | 0.0402                            | 0.99891                                      | 1.33            |

|                 |         |      |                 |         |      |
|-----------------|---------|------|-----------------|---------|------|
| 0.0553          | 0.99930 | 1.32 | 0.0553          | 0.99946 | 1.33 |
| 0.0704          | 0.99983 | 1.33 | 0.0704          | 1.00002 | 1.34 |
| 0.0855          | 1.00041 | 1.33 | 0.0855          | 1.00060 | 1.35 |
| $w_1 = 0.003^b$ |         |      | $w_2 = 0.003^b$ |         |      |
| 0.0100          | 0.99825 | 1.32 | 0.0100          | 0.99851 | 1.33 |
| 0.0251          | 0.99880 | 1.33 | 0.0251          | 0.99904 | 1.34 |
| 0.0401          | 0.99932 | 1.34 | 0.0401          | 0.99955 | 1.35 |
| 0.0552          | 0.99988 | 1.34 | 0.0552          | 1.00012 | 1.35 |
| 0.0703          | 1.00045 | 1.35 | 0.0703          | 1.00070 | 1.36 |
| 0.0855          | 1.00107 | 1.35 | 0.0854          | 1.00133 | 1.37 |
| $w_1 = 0.005^b$ |         |      | $w_2 = 0.005^b$ |         |      |
| 0.0100          | 0.99892 | 1.33 | 0.0100          | 0.99924 | 1.34 |
| 0.0251          | 0.99948 | 1.34 | 0.0251          | 0.99979 | 1.35 |
| 0.0401          | 1.00005 | 1.35 | 0.0401          | 1.00036 | 1.36 |
| 0.0552          | 1.00062 | 1.36 | 0.0552          | 1.00090 | 1.37 |
| 0.0703          | 1.00121 | 1.37 | 0.0703          | 1.00153 | 1.38 |
| 0.0854          | 1.00181 | 1.38 | 0.0854          | 1.00213 | 1.39 |

<sup>a</sup> Standard uncertainties  $u$  are:  $u(\rho) = 5 \times 10^{-5} \text{ kg} \cdot \text{m}^{-3}$ ,  $u(\eta) = 0.003 \text{ mP} \cdot \text{s}$  and  $u(T) = 0.01 \text{ K}$ .

<sup>b</sup>  $w_1$  and  $w_2$  are mass fractions of  $\alpha$  and  $\beta$ -cyclodextrin in aqueous mixture respectively.

**Table S3. Experimental values of density ( $\rho$ ), viscosity ( $\eta$ ), refractive index ( $n_D$ ), and pH of selected amino acids in different mass fractions of aqueous  $\alpha$  and  $\beta$ -cyclodextrin mixtures at 298.15 K<sup>a</sup>**

| molality<br>/mol·kg <sup>-1</sup> | $\rho \times 10^{-3}$<br>/kg·m <sup>-3</sup> | $\eta$<br>/mP·s | $n_D$  | pH    | molality<br>/mol·kg <sup>-1</sup> | $\rho \times 10^{-3}$<br>/kg·m <sup>-3</sup> | $\eta$<br>/mP·s | $n_D$  | pH    |
|-----------------------------------|----------------------------------------------|-----------------|--------|-------|-----------------------------------|----------------------------------------------|-----------------|--------|-------|
| L-Arginine                        |                                              |                 |        |       |                                   |                                              |                 |        |       |
| $w_1 = 0.001^b$                   |                                              |                 |        |       | $w_2 = 0.001^b$                   |                                              |                 |        |       |
| 0.010038                          | 0.99792                                      | 1.31            | 1.3330 | 10.32 | 0.010038                          | 0.99800                                      | 1.33            | 1.3332 | 10.25 |
| 0.025140                          | 0.99878                                      | 1.33            | 1.3332 | 10.44 | 0.025141                          | 0.99875                                      | 1.34            | 1.3334 | 10.35 |
| 0.040295                          | 0.99965                                      | 1.34            | 1.3333 | 10.54 | 0.040300                          | 0.99953                                      | 1.36            | 1.3335 | 10.43 |
| 0.055503                          | 1.00052                                      | 1.36            | 1.3335 | 10.63 | 0.055514                          | 1.00033                                      | 1.39            | 1.3337 | 10.54 |
| 0.070763                          | 1.00141                                      | 1.37            | 1.3336 | 10.69 | 0.070782                          | 1.00114                                      | 1.40            | 1.3339 | 10.61 |
| 0.086075                          | 1.00232                                      | 1.39            | 1.3339 | 10.73 | 0.086105                          | 1.00197                                      | 1.42            | 1.3341 | 10.69 |
| $w_1 = 0.003^b$                   |                                              |                 |        |       | $w_2 = 0.003^b$                   |                                              |                 |        |       |
| 0.010032                          | 0.99851                                      | 1.32            | 1.3334 | 10.30 | 0.010031                          | 0.99862                                      | 1.34            | 1.3335 | 10.12 |
| 0.025127                          | 0.99932                                      | 1.34            | 1.3335 | 10.42 | 0.025126                          | 0.99934                                      | 1.36            | 1.3336 | 10.25 |
| 0.040275                          | 1.00013                                      | 1.36            | 1.3336 | 10.55 | 0.040277                          | 1.00010                                      | 1.38            | 1.3337 | 10.36 |
| 0.055478                          | 1.00097                                      | 1.37            | 1.3338 | 10.62 | 0.055485                          | 1.00084                                      | 1.40            | 1.3339 | 10.44 |
| 0.070735                          | 1.00181                                      | 1.39            | 1.3340 | 10.66 | 0.070747                          | 1.00164                                      | 1.42            | 1.3341 | 10.55 |
| 0.086043                          | 1.00268                                      | 1.40            | 1.3342 | 10.70 | 0.086063                          | 1.00245                                      | 1.44            | 1.3343 | 10.64 |
| $w_1 = 0.005^b$                   |                                              |                 |        |       | $w_2 = 0.005^b$                   |                                              |                 |        |       |
| 0.010026                          | 0.99911                                      | 1.34            | 1.3337 | 9.99  | 0.010024                          | 0.99935                                      | 1.35            | 1.3338 | 9.80  |
| 0.025113                          | 0.99985                                      | 1.35            | 1.3338 | 10.12 | 0.025108                          | 1.00004                                      | 1.37            | 1.3340 | 9.95  |
| 0.040256                          | 1.00062                                      | 1.37            | 1.3339 | 10.27 | 0.040249                          | 1.00077                                      | 1.40            | 1.3341 | 10.17 |
| 0.055453                          | 1.00141                                      | 1.39            | 1.3341 | 10.40 | 0.055448                          | 1.00150                                      | 1.42            | 1.3342 | 10.32 |
| 0.070708                          | 1.00218                                      | 1.41            | 1.3342 | 10.52 | 0.070702                          | 1.00226                                      | 1.43            | 1.3344 | 10.46 |

0.086017 1.00298 1.42 1.3344 10.61 0.086013 1.00303 1.45 1.3346 10.60

---

L-Histidine

---

$w_1 = 0.001^b$

$w_2 = 0.001^b$

|          |         |      |        |      |          |         |       |        |      |
|----------|---------|------|--------|------|----------|---------|-------|--------|------|
| 0.010037 | 0.99791 | 1.30 | 1.3330 | 7.45 | 0.010036 | 0.99801 | 1.320 | 1.3331 | 7.44 |
| 0.025128 | 0.99878 | 1.32 | 1.3331 | 7.48 | 0.025126 | 0.99885 | 1.330 | 1.3332 | 7.46 |
| 0.040262 | 0.99969 | 1.33 | 1.3333 | 7.51 | 0.040259 | 0.99977 | 1.340 | 1.3334 | 7.48 |
| 0.055437 | 1.00065 | 1.34 | 1.3334 | 7.53 | 0.055431 | 1.00075 | 1.360 | 1.3336 | 7.50 |
| 0.070655 | 1.00159 | 1.35 | 1.3335 | 7.55 | 0.070644 | 1.00175 | 1.370 | 1.3338 | 7.51 |
| 0.085911 | 1.00258 | 1.36 | 1.3336 | 7.56 | 0.085893 | 1.00279 | 1.400 | 1.3339 | 7.52 |

$w_1 = 0.003^b$

$w_2 = 0.003^b$

|          |         |      |        |      |          |         |      |        |      |
|----------|---------|------|--------|------|----------|---------|------|--------|------|
| 0.010031 | 0.99850 | 1.32 | 1.3333 | 7.44 | 0.010029 | 0.99863 | 1.34 | 1.3334 | 7.45 |
| 0.025114 | 0.99932 | 1.33 | 1.3334 | 7.47 | 0.025112 | 0.99943 | 1.35 | 1.3335 | 7.46 |
| 0.040242 | 1.00020 | 1.35 | 1.3335 | 7.49 | 0.040237 | 1.00032 | 1.36 | 1.3337 | 7.47 |
| 0.055412 | 1.00109 | 1.37 | 1.3337 | 7.51 | 0.055402 | 1.00127 | 1.39 | 1.3338 | 7.48 |
| 0.070629 | 1.00196 | 1.38 | 1.3338 | 7.53 | 0.070609 | 1.00223 | 1.40 | 1.3340 | 7.50 |
| 0.085882 | 1.00292 | 1.39 | 1.3339 | 7.55 | 0.085854 | 1.00324 | 1.44 | 1.3341 | 7.52 |

$w_1 = 0.005^b$

$w_2 = 0.005^b$

|          |         |      |        |      |          |         |      |        |      |
|----------|---------|------|--------|------|----------|---------|------|--------|------|
| 0.010024 | 0.99911 | 1.33 | 1.3336 | 7.40 | 0.010022 | 0.99936 | 1.35 | 1.3337 | 7.38 |
| 0.025100 | 0.99989 | 1.35 | 1.3338 | 7.45 | 0.025094 | 1.00012 | 1.37 | 1.3338 | 7.40 |
| 0.040221 | 1.00072 | 1.36 | 1.3339 | 7.47 | 0.040210 | 1.00098 | 1.39 | 1.3339 | 7.42 |
| 0.055386 | 1.00156 | 1.39 | 1.3341 | 7.49 | 0.055368 | 1.00189 | 1.41 | 1.3341 | 7.44 |
| 0.070597 | 1.00240 | 1.39 | 1.3342 | 7.51 | 0.070566 | 1.00284 | 1.43 | 1.3342 | 7.47 |
| 0.085852 | 1.00326 | 1.41 | 1.3343 | 7.53 | 0.085806 | 1.00379 | 1.45 | 1.3343 | 7.49 |

---

<sup>a</sup> Standard uncertainties  $u$  are:  $u(\rho) = 5 \times 10^{-5} \text{ kg} \cdot \text{m}^{-3}$ ,  $u(\eta) = 0.003 \text{ mP} \cdot \text{s}$ ,  $u(n_D) = 0.0002$ ,  $u(\text{pH}) = 0.01$  and  $u(T) = 0.01 \text{ K}$ .

<sup>b</sup>  $w_1$  and  $w_2$  are mass fractions of  $\alpha$  and  $\beta$ -cyclodextrin in aqueous mixture respectively.

---

**Table S4. Apparent molar volume ( $\phi_V$ ) and  $(\eta_r-1)/\sqrt{m}$  of glycine in different mass fractions of aqueous  $\alpha$  and  $\beta$ -cyclodextrin mixtures at 298.15 K<sup>a</sup>**

| molality              | $\phi_V \times 10^{-6}$            | $(\eta_r-1)/\sqrt{m}$                  | molality              | $\phi_V \times 10^{-6}$            | $(\eta_r-1)/\sqrt{m}$                  |
|-----------------------|------------------------------------|----------------------------------------|-----------------------|------------------------------------|----------------------------------------|
| /mol·kg <sup>-1</sup> | / m <sup>3</sup> mol <sup>-1</sup> | /kg <sup>1/2</sup> mol <sup>-1/2</sup> | /mol·kg <sup>-1</sup> | / m <sup>3</sup> mol <sup>-1</sup> | /kg <sup>1/2</sup> mol <sup>-1/2</sup> |
| Glycine               |                                    |                                        |                       |                                    |                                        |
| $w_1 = 0.001^b$       |                                    |                                        | $w_2 = 0.001^b$       |                                    |                                        |
| 0.0100                | 41.20                              | 0.070                                  | 0.0100                | 41.19                              | 0.082                                  |
| 0.0251                | 40.39                              | 0.079                                  | 0.0251                | 40.35                              | 0.093                                  |
| 0.0402                | 39.95                              | 0.083                                  | 0.0402                | 39.65                              | 0.100                                  |
| 0.0553                | 39.55                              | 0.087                                  | 0.0553                | 39.38                              | 0.105                                  |
| 0.0704                | 39.19                              | 0.094                                  | 0.0704                | 38.90                              | 0.106                                  |
| 0.0855                | 38.95                              | 0.096                                  | 0.0855                | 38.61                              | 0.108                                  |
| $w_1 = 0.003^b$       |                                    |                                        | $w_2 = 0.003^b$       |                                    |                                        |
| 0.0100                | 41.17                              | 0.091                                  | 0.0100                | 41.17                              | 0.115                                  |
| 0.0251                | 40.36                              | 0.102                                  | 0.0251                | 40.36                              | 0.119                                  |
| 0.0401                | 39.67                              | 0.106                                  | 0.0401                | 39.63                              | 0.130                                  |
| 0.0552                | 39.17                              | 0.113                                  | 0.0552                | 38.95                              | 0.132                                  |
| 0.0703                | 38.73                              | 0.116                                  | 0.0703                | 38.45                              | 0.136                                  |
| 0.0855                | 38.36                              | 0.119                                  | 0.0854                | 37.94                              | 0.143                                  |
| $w_1 = 0.005^b$       |                                    |                                        | $w_2 = 0.005^b$       |                                    |                                        |
| 0.0100                | 41.15                              | 0.123                                  | 0.0100                | 41.14                              | 0.129                                  |
| 0.0251                | 39.95                              | 0.130                                  | 0.0251                | 39.93                              | 0.137                                  |
| 0.0401                | 39.10                              | 0.134                                  | 0.0401                | 39.10                              | 0.145                                  |
| 0.0552                | 38.59                              | 0.137                                  | 0.0552                | 38.36                              | 0.150                                  |
| 0.0703                | 38.00                              | 0.144                                  | 0.0703                | 37.67                              | 0.153                                  |
| 0.0854                | 37.52                              | 0.150                                  | 0.0854                | 37.13                              | 0.159                                  |

<sup>a</sup> Standard uncertainties  $u$  are:  $u(T) = 0.01\text{K}$ .

<sup>b</sup>  $w_1$  and  $w_2$  are mass fractions of  $\alpha$  and  $\beta$ -cyclodextrin in aqueous mixture respectively.



**Table S5. Apparent molar volume ( $\phi_V$ ),  $(\eta_r-1)/\sqrt{m}$  and molar refraction ( $R_M$ ) of selected amino acids in different mass fractions of aqueous  $\alpha$  and  $\beta$ -cyclodextrin mixtures at 298.15 K<sup>a</sup>**

| molality              | $\phi_V \times 10^{-6}$           | $(\eta_r-1)/\sqrt{m}$                  | $R_M$                             | molality              | $\phi_V \times 10^{-6}$           | $(\eta_r-1)/\sqrt{m}$                  | $R_M$                             |
|-----------------------|-----------------------------------|----------------------------------------|-----------------------------------|-----------------------|-----------------------------------|----------------------------------------|-----------------------------------|
| /mol·kg <sup>-1</sup> | /m <sup>3</sup> mol <sup>-1</sup> | /kg <sup>1/2</sup> mol <sup>-1/2</sup> | /m <sup>3</sup> mol <sup>-1</sup> | /mol·kg <sup>-1</sup> | /m <sup>3</sup> mol <sup>-1</sup> | /kg <sup>1/2</sup> mol <sup>-1/2</sup> | /m <sup>3</sup> mol <sup>-1</sup> |
| L-Arginine            |                                   |                                        |                                   |                       |                                   |                                        |                                   |
| $w_1 = 0.001^b$       |                                   |                                        |                                   | $w_2 = 0.001^b$       |                                   |                                        |                                   |
| 0.010038              | 119.51                            | 0.155                                  | 35.9068                           | 0.010038              | 126.51                            | 0.230                                  | 35.9235                           |
| 0.025140              | 118.11                            | 0.196                                  | 35.8955                           | 0.025141              | 125.31                            | 0.194                                  | 35.9161                           |
| 0.040295              | 117.51                            | 0.193                                  | 35.8740                           | 0.040300              | 124.26                            | 0.230                                  | 35.8979                           |
| 0.055503              | 117.24                            | 0.230                                  | 35.8623                           | 0.055514              | 123.42                            | 0.294                                  | 35.8887                           |
| 0.070763              | 116.79                            | 0.233                                  | 35.8402                           | 0.070782              | 122.79                            | 0.289                                  | 35.8791                           |
| 0.086075              | 116.27                            | 0.264                                  | 35.8369                           | 0.086105              | 122.15                            | 0.315                                  | 35.8689                           |
| $w_1 = 0.003^b$       |                                   |                                        |                                   | $w_2 = 0.003^b$       |                                   |                                        |                                   |
| 0.010032              | 123.45                            | 0.154                                  | 35.9247                           | 0.010031              | 129.44                            | 0.229                                  | 35.9306                           |
| 0.025127              | 121.64                            | 0.194                                  | 35.9054                           | 0.025126              | 127.63                            | 0.241                                  | 35.9144                           |
| 0.040275              | 121.19                            | 0.230                                  | 35.8861                           | 0.040277              | 126.18                            | 0.266                                  | 35.8969                           |
| 0.055478              | 120.44                            | 0.229                                  | 35.8755                           | 0.055485              | 125.88                            | 0.292                                  | 35.8899                           |
| 0.070735              | 120.01                            | 0.246                                  | 35.8649                           | 0.070747              | 124.86                            | 0.316                                  | 35.8807                           |
| 0.086043              | 119.38                            | 0.262                                  | 35.8532                           | 0.086063              | 124.07                            | 0.338                                  | 35.8712                           |
| $w_1 = 0.005^b$       |                                   |                                        |                                   | $w_2 = 0.005^b$       |                                   |                                        |                                   |
| 0.010026              | 128.37                            | 0.191                                  | 35.9325                           | 0.010024              | 132.34                            | 0.227                                  | 35.9336                           |
| 0.025113              | 126.37                            | 0.193                                  | 35.9157                           | 0.025108              | 129.94                            | 0.239                                  | 35.9284                           |
| 0.040256              | 125.12                            | 0.228                                  | 35.8978                           | 0.040249              | 128.34                            | 0.302                                  | 35.9119                           |
| 0.055453              | 124.19                            | 0.259                                  | 35.8889                           | 0.055448              | 127.61                            | 0.322                                  | 35.8955                           |
| 0.070708              | 123.94                            | 0.287                                  | 35.8711                           | 0.070702              | 126.76                            | 0.313                                  | 35.8877                           |

|                 |        |       |         |                 |        |       |         |
|-----------------|--------|-------|---------|-----------------|--------|-------|---------|
| 0.086017        | 123.43 | 0.286 | 35.8620 | 0.086013        | 126.10 | 0.336 | 35.8796 |
| L-Histidine     |        |       |         |                 |        |       |         |
| $w_1 = 0.001^b$ |        |       |         | $w_2 = 0.001^b$ |        |       |         |
| 0.010037        | 101.42 | 0.077 | 31.9805 | 0.010036        | 106.41 | 0.154 | 31.9860 |
| 0.025128        | 99.01  | 0.147 | 31.9613 | 0.025126        | 102.20 | 0.146 | 31.9678 |
| 0.040262        | 97.41  | 0.155 | 31.9497 | 0.040259        | 99.15  | 0.153 | 31.9558 |
| 0.055437        | 95.77  | 0.165 | 31.9277 | 0.055431        | 96.66  | 0.196 | 31.9419 |
| 0.070655        | 95.11  | 0.175 | 31.9064 | 0.070644        | 94.96  | 0.203 | 31.9274 |
| 0.085911        | 94.10  | 0.185 | 31.8836 | 0.085893        | 93.38  | 0.262 | 31.9029 |
| $w_1 = 0.003^b$ |        |       |         | $w_2 = 0.003^b$ |        |       |         |
| 0.010031        | 105.36 | 0.154 | 31.9877 | 0.010029        | 109.35 | 0.229 | 31.9923 |
| 0.025114        | 102.56 | 0.146 | 31.9702 | 0.025112        | 104.94 | 0.193 | 31.9754 |
| 0.040242        | 100.35 | 0.192 | 31.9508 | 0.040237        | 101.59 | 0.190 | 31.9643 |
| 0.055412        | 99.17  | 0.229 | 31.9397 | 0.055402        | 98.97  | 0.259 | 31.9427 |
| 0.070629        | 98.78  | 0.232 | 31.9207 | 0.070609        | 97.33  | 0.259 | 31.9294 |
| 0.085882        | 97.46  | 0.236 | 31.8988 | 0.085854        | 95.68  | 0.339 | 31.9059 |
| $w_1 = 0.005^b$ |        |       |         | $w_2 = 0.005^b$ |        |       |         |
| 0.010024        | 109.30 | 0.152 | 31.9943 | 0.010022        | 112.27 | 0.227 | 31.9950 |
| 0.025100        | 105.69 | 0.193 | 31.9867 | 0.025094        | 107.67 | 0.239 | 31.9794 |
| 0.040221        | 103.54 | 0.190 | 31.9689 | 0.040210        | 104.01 | 0.264 | 31.9606 |
| 0.055386        | 102.38 | 0.259 | 31.9595 | 0.055368        | 101.44 | 0.290 | 31.9489 |
| 0.070597        | 101.72 | 0.230 | 31.9413 | 0.070566        | 99.40  | 0.314 | 31.9273 |
| 0.085852        | 101.05 | 0.261 | 31.9226 | 0.085806        | 98.08  | 0.336 | 31.9058 |

<sup>a</sup> Standard uncertainties  $u$  are:  $u(T) = 0.01\text{K}$ .

<sup>b</sup>  $w_1$  and  $w_2$  are mass fractions of  $\alpha$  and  $\beta$ -cyclodextrin in aqueous mixture respectively.

**Table S6. Limiting apparent molar volume ( $\phi_V^0$ ), experimental slope ( $S_V^*$ ), viscosity  $A$  and  $B$ -coefficient and limiting molar refraction ( $R_M^0$ ) of amino acids in different mass fractions of aqueous  $\alpha$  and  $\beta$ -cyclodextrin mixtures at 298.15 K<sup>a</sup>**

| Aq. solvent mixture | $\phi_V^0$<br>/ m <sup>3</sup> mol <sup>-1</sup> | $S_V^*$<br>/m <sup>3</sup> mol <sup>-3/2</sup> kg <sup>1/2</sup> | $B$<br>/kg <sup>1/2</sup> mol <sup>-1/2</sup> | $A$<br>/kg mol <sup>-1</sup> | $R_M^0$<br>/m <sup>3</sup> mol <sup>-1</sup> |
|---------------------|--------------------------------------------------|------------------------------------------------------------------|-----------------------------------------------|------------------------------|----------------------------------------------|
| Glycine             |                                                  |                                                                  |                                               |                              |                                              |
| $w_1 = 0.001^b$     | 41.22                                            | -9.33                                                            | 0.152                                         | 0.0028                       |                                              |
| $w_1 = 0.003^b$     | 41.64                                            | -10.85                                                           | 0.156                                         | 0.0030                       |                                              |
| $w_1 = 0.005^b$     | 42.08                                            | -12.06                                                           | 0.160                                         | 0.0032                       |                                              |
| L-Arginine          |                                                  |                                                                  |                                               |                              |                                              |
| $w_1 = 0.001^b$     | 120.86                                           | -15.71                                                           | 0.522                                         | 0.102                        | 35.95                                        |
| $w_1 = 0.003^b$     | 125.18                                           | -19.90                                                           | 0.538                                         | 0.106                        | 35.96                                        |
| $w_1 = 0.005^b$     | 130.58                                           | -25.55                                                           | 0.586                                         | 0.118                        | 35.97                                        |
| L-Histidine         |                                                  |                                                                  |                                               |                              |                                              |
| $w_1 = 0.001^b$     | 105.08                                           | -38.05                                                           | 0.502                                         | 0.045                        | 32.01                                        |
| $w_1 = 0.003^b$     | 108.98                                           | -40.06                                                           | 0.528                                         | 0.087                        | 32.02                                        |
| $w_1 = 0.005^b$     | 112.80                                           | -42.37                                                           | 0.548                                         | 0.099                        | 32.03                                        |
| Glycine             |                                                  |                                                                  |                                               |                              |                                              |
| $w_2 = 0.001^b$     | 41.88                                            | -10.25                                                           | 0.152                                         | 0.0030                       |                                              |
| $w_2 = 0.003^b$     | 42.12                                            | -12.08                                                           | 0.158                                         | 0.0033                       |                                              |
| $w_2 = 0.005^b$     | 42.36                                            | -14.50                                                           | 0.164                                         | 0.0035                       |                                              |
| L-Arginine          |                                                  |                                                                  |                                               |                              |                                              |
| $w_2 = 0.001^b$     | 128.84                                           | -22.80                                                           | 0.546                                         | 0.144                        | 35.97                                        |
| $w_2 = 0.003^b$     | 131.98                                           | -26.97                                                           | 0.584                                         | 0.157                        | 35.98                                        |
| $w_2 = 0.005^b$     | 135.18                                           | -31.90                                                           | 0.602                                         | 0.164                        | 35.99                                        |
| L-Histidine         |                                                  |                                                                  |                                               |                              |                                              |
| $w_2 = 0.001^b$     | 113.02                                           | -68.10                                                           | 0.528                                         | 0.075                        | 32.03                                        |
| $w_2 = 0.003^b$     | 116.28                                           | -71.60                                                           | 0.546                                         | 0.130                        | 32.04                                        |
| $w_2 = 0.005^b$     | 119.50                                           | -75.14                                                           | 0.584                                         | 0.156                        | 32.05                                        |

<sup>a</sup> Standard uncertainties  $u$  are:  $u(T) = 0.01\text{K}$ .

<sup>b</sup>  $w_1$  and  $w_2$  are mass fractions of  $\alpha$  and  $\beta$ -cyclodextrin in aqueous mixture respectively.
